# Supplementary material for: CAR-T Cells Targeting Epstein-Barr Virus gp350 Validated in a Humanized Mouse Model of EBV Infection and Lymphoproliferative Disease
Source: PubMed Central journal article supplement — Mol Ther Oncolytics. 2020 Aug 8;18:504–24. doi: 10.1016/j.omto.2020.08.005 (PMC7479496; doi:10.1016/j.omto.2020.08.005), 2020-08-08
Supplement: mmc1.pdf [file mmc1.pdf]

## **Supplemental Information**

### **CAR-T Cells Targeting Epstein-Barr Virus gp350**

#### **Validated in a Humanized Mouse Model of**

#### **EBV Infection and Lymphoproliferative Disease**

**Constanze Slabik, Maja Kalbarczyk, Simon Danisch, Reinhard Zeidler, Frank Klawonn, Valery Volk, Nicole Krönke, Friedrich Feuerhake, Constanca Ferreira de Figueiredo, Rainer Blasczyk, Henning Olbrich, Sebastian J. Theobald, Andreas Schneider, Arnold Ganser, Constantin von Kaisenberg, Stefan Lienenklaus, Andre Bleich, Wolfgang Hammerschmidt, and Renata Stripecke**

Supplemental data  
Figure S1

A

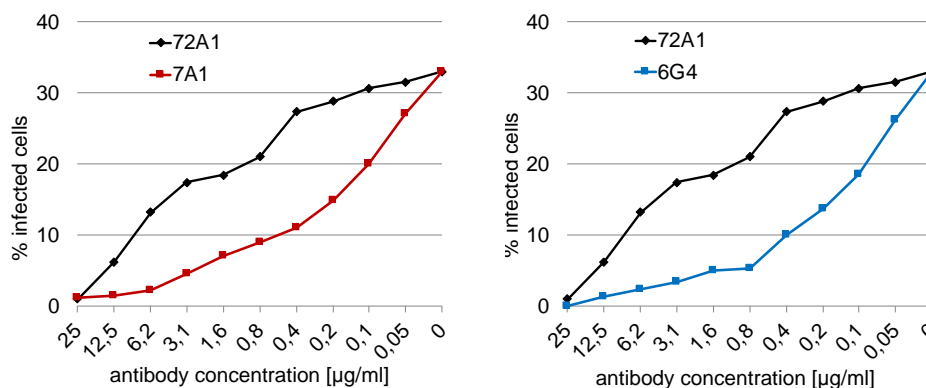

B

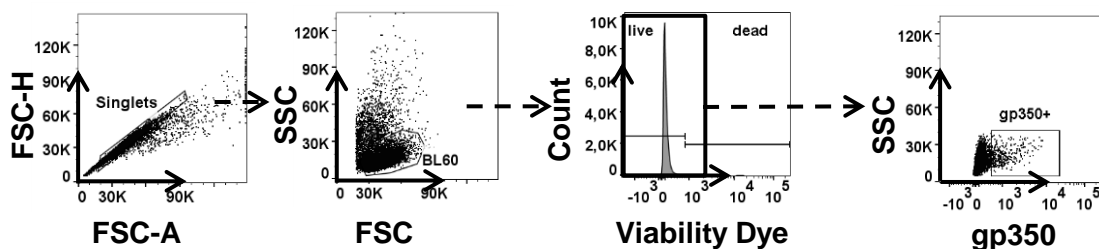

**Figure S1 - *In vitro* neutralization assay for gp350-binding monoclonal antibodies and flow cytometry analyses for detection of gp350 on the cell surface (see Fig. 1A).**

(A) Aliquots of EBV/B95-8/GFP (MOI of 0.2 for  $2 \times 10^5$  cells) were pre-incubated with serial dilutions of the monoclonal antibodies (72A1: black, 7A1: red and 6G4: blue) at the indicated concentrations and at room temperature for 30 min. Primary B cells were infected with the viral aliquots in a final volume of  $400 \mu\text{l}$ . The frequencies of GFP<sup>+</sup> infected B cells were quantified by flow cytometry 2 days later. (B) Flow cytometry gating strategy for detection of gp350. Viable cells were gated showing representative example of BL-60 EBV<sup>+</sup> cell line.

A

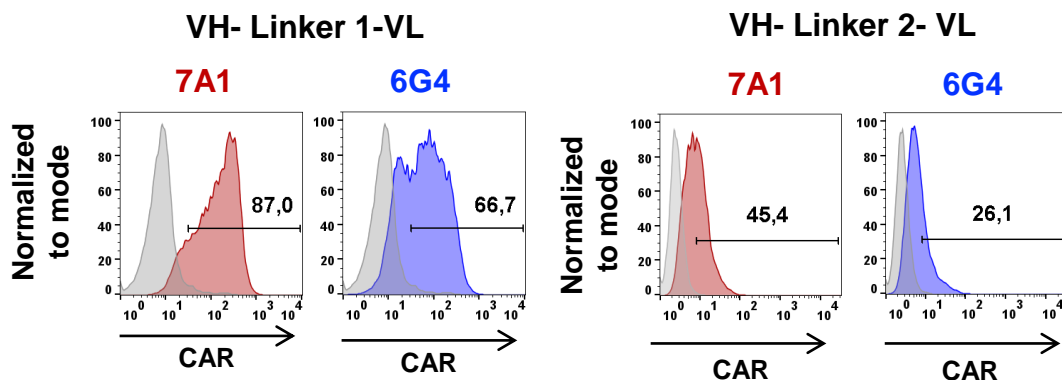

B

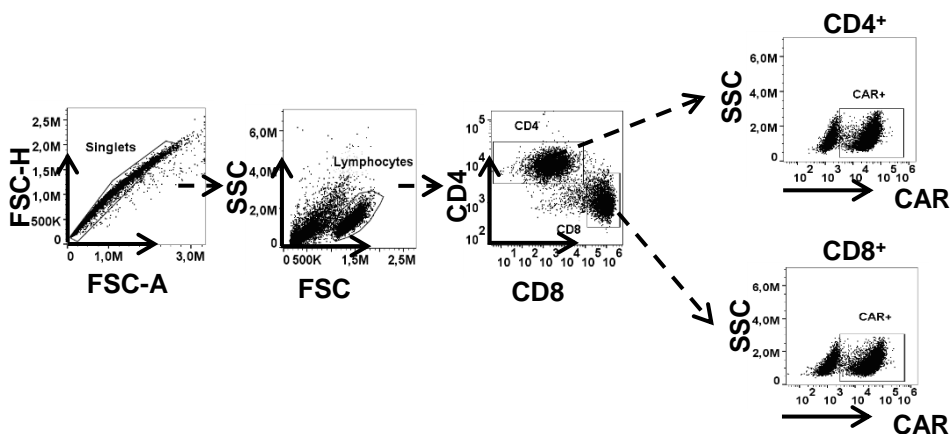

C

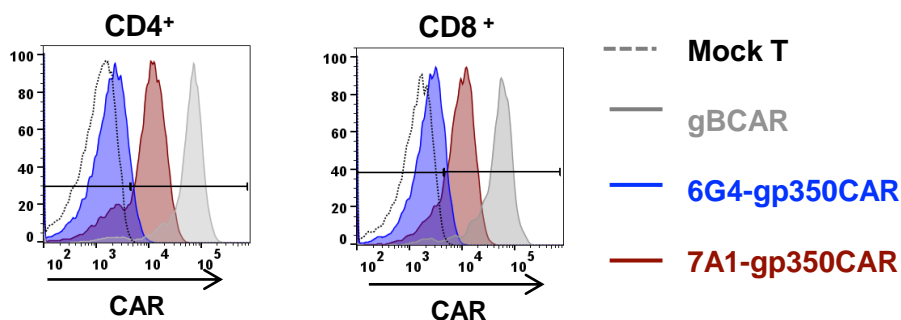

**Figure S2 – Detection and quantification of gp350CAR<sup>+</sup> cells (see Fig. 1C, D).**

(A) Effects of different linkers in scFvs. CARs with 7A1 or 6G4 scFvs and different linkers were pre-tested after transfection of 293T cells and CAR expression was analyzed by flow cytometry. (B) Flow cytometry gating strategy for analyses of CARs (see Fig. 1C). Representative example shows 7A1-gp350CAR expression on CD4<sup>+</sup> or CD8<sup>+</sup> T cells (C) Calculation of mean fluorescence intensity (MFI) of CAR<sup>+</sup> cells. MFI of non-transduced Mock T cells of the same donor was used as a reference.

A

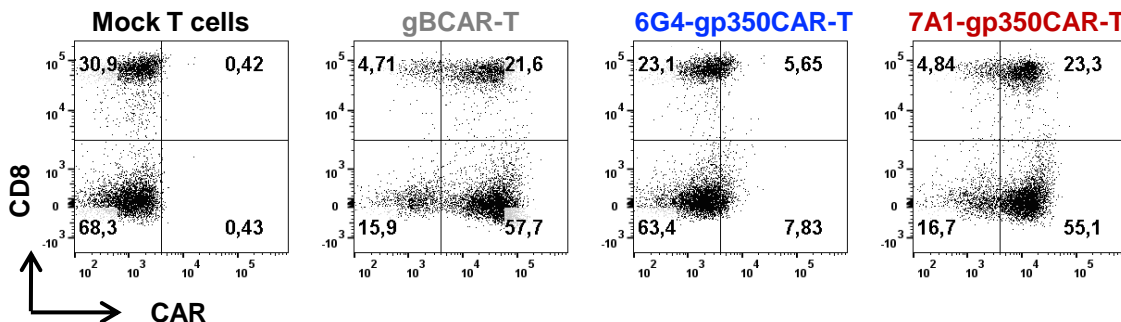

B

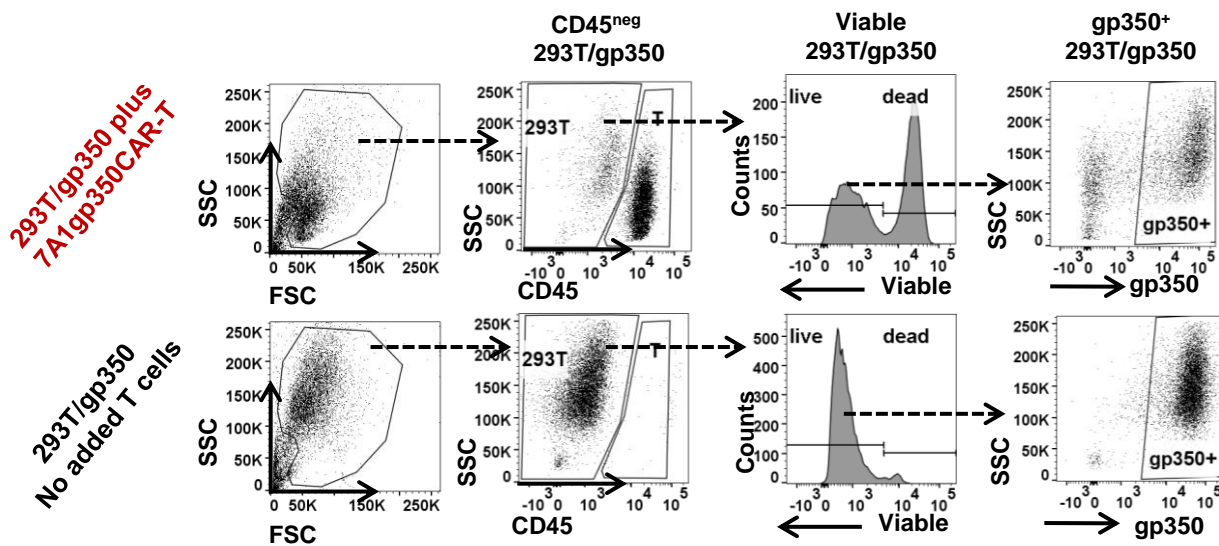

**Figure S3 – Flow cytometry analyses of gp350CAR-T cells in co-culture with 293T targets (see Fig. 1G, H).**

(A) Flow cytometry analyses of Mock T or CAR-T cells used for co-cultures with 293T/gp350. (B) Flow cytometry gating strategy for analyses of remaining viable gp350<sup>+</sup> 293T/gp350 targets. Upper panels show 7A1-gp350CAR-T and 293T/gp350 targets at 3:1 effector to target ratio after 24 hours of co-culture. Lower panels show as 293Tgp350 targets with no added T cells. % viable targets were calculated as: % viable targets in CAR-T co-cultures/ % viable targets with no added T cells. % viable gp350<sup>+</sup> targets were calculated as % viable gp350<sup>+</sup> targets in co-cultures / % viable gp350<sup>+</sup> viable targets with no added T cells.

A

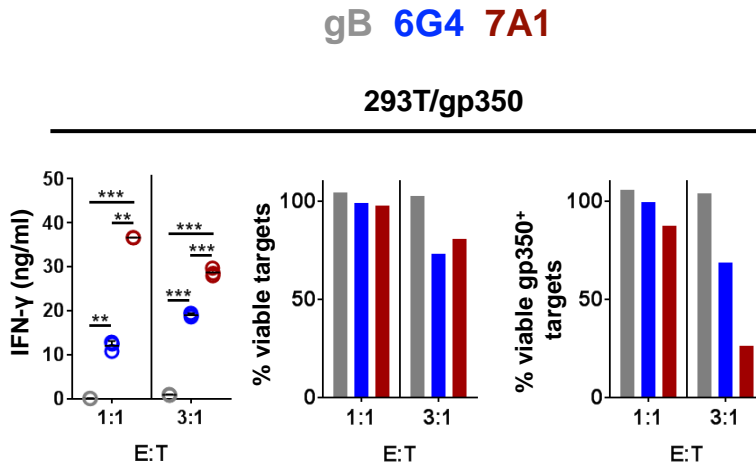

B

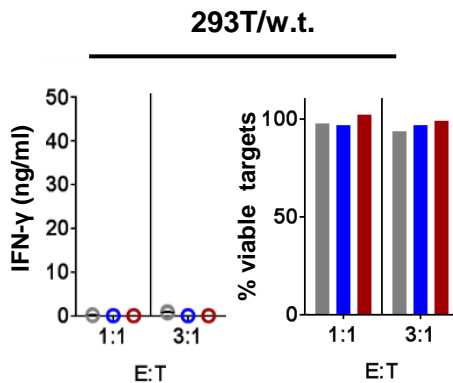

**Figure S4 - 48 h co-cultures of gp350CAR-T cells with 293T targets (see Fig. 1G, H).**

(A) 293T/gp350 cells were cultured with CAR-T cells (gB: grey; 6G4-gp350: blue; 7A1-gp350: red) for 48 h at 1:1 or 3:1 effector : target (E:T) ratios. Left panel: Concentrations of secreted IFN- $\gamma$  (ng/ml) measured in the cell supernatants (n=3) \*\* p<0.01, \*\*\* p<0.001. Middle panel: Percentages of viable 293T/gp350 cells analyzed by flow cytometry shown for one experiment. Right panel: Percentages of viable gp350<sup>+</sup> 293T/gp350 cells analyzed by flow cytometry shown for one experiment. (B) Control co-culture of 293T/w.t. cells with CAR-T cells. Left panel: No detectable secreted IFN- $\gamma$ . Right panel: No cell killing.

Figure S5

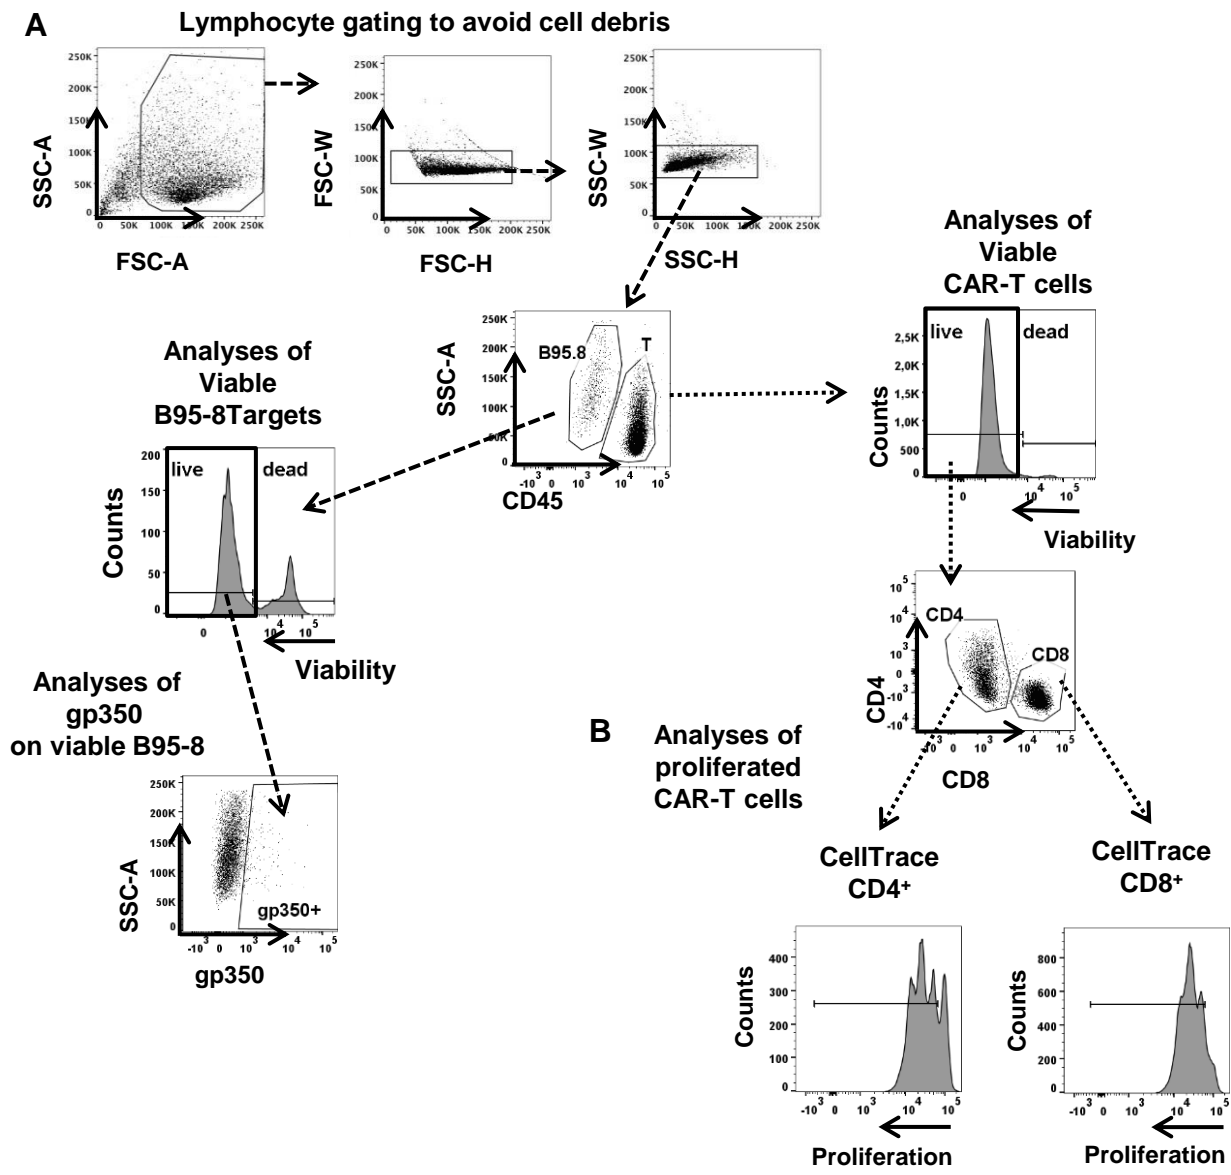

Figure S5 - Flow cytometry gating strategy for analyses of B95-8 co-cultures with CAR-T cells co-cultures (see Fig. 2 C-E).

(A) Representative gating strategy for analyses of B95-8 targets cells co-cultured with 7A1-gp350CAR-T cells for 38 hours at an effector : target ratio of 10:1. (B) Representative gating strategy for analyses of 7A1-gp350CAR-T cells for proliferation of CD4<sup>+</sup> and CD8<sup>+</sup> T cells after 86 hours of co-culture.at an effector : target ratio of 10:1.

Figure S6

A

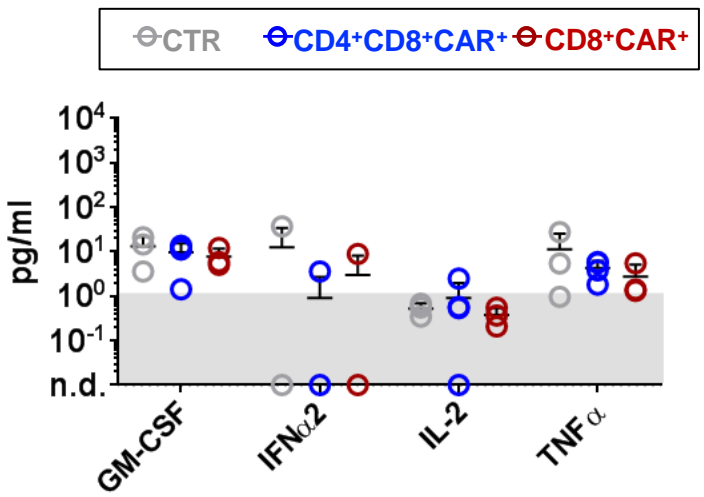

B

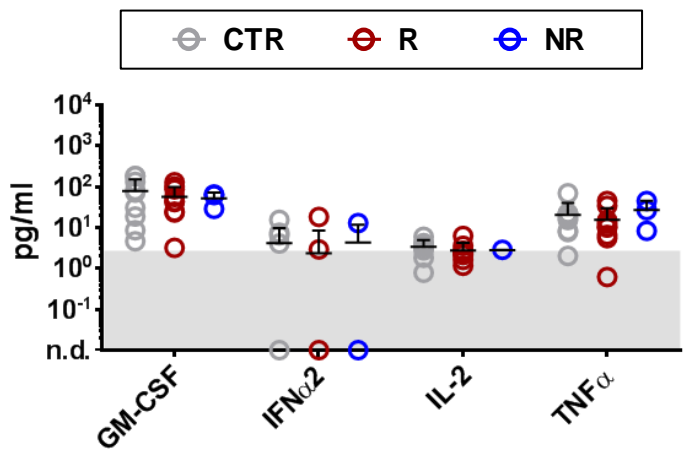

Figure S6 - Human cytokines detected in plasma of mice at endpoint analysis not varying among cohorts (see Fig. 4G and Fig. 7F).

Concentration (pg/ml) of GM-CSF, IFN- $\alpha$ 2, IL-2, TNF- $\alpha$  measured for EBV-infection control and CAR-T cell treated cohorts. (A) Data for the protective model at 5 wpi. (B) Data for the therapeutic model at 8 wpi. No significant differences were observed.

**Figure S7**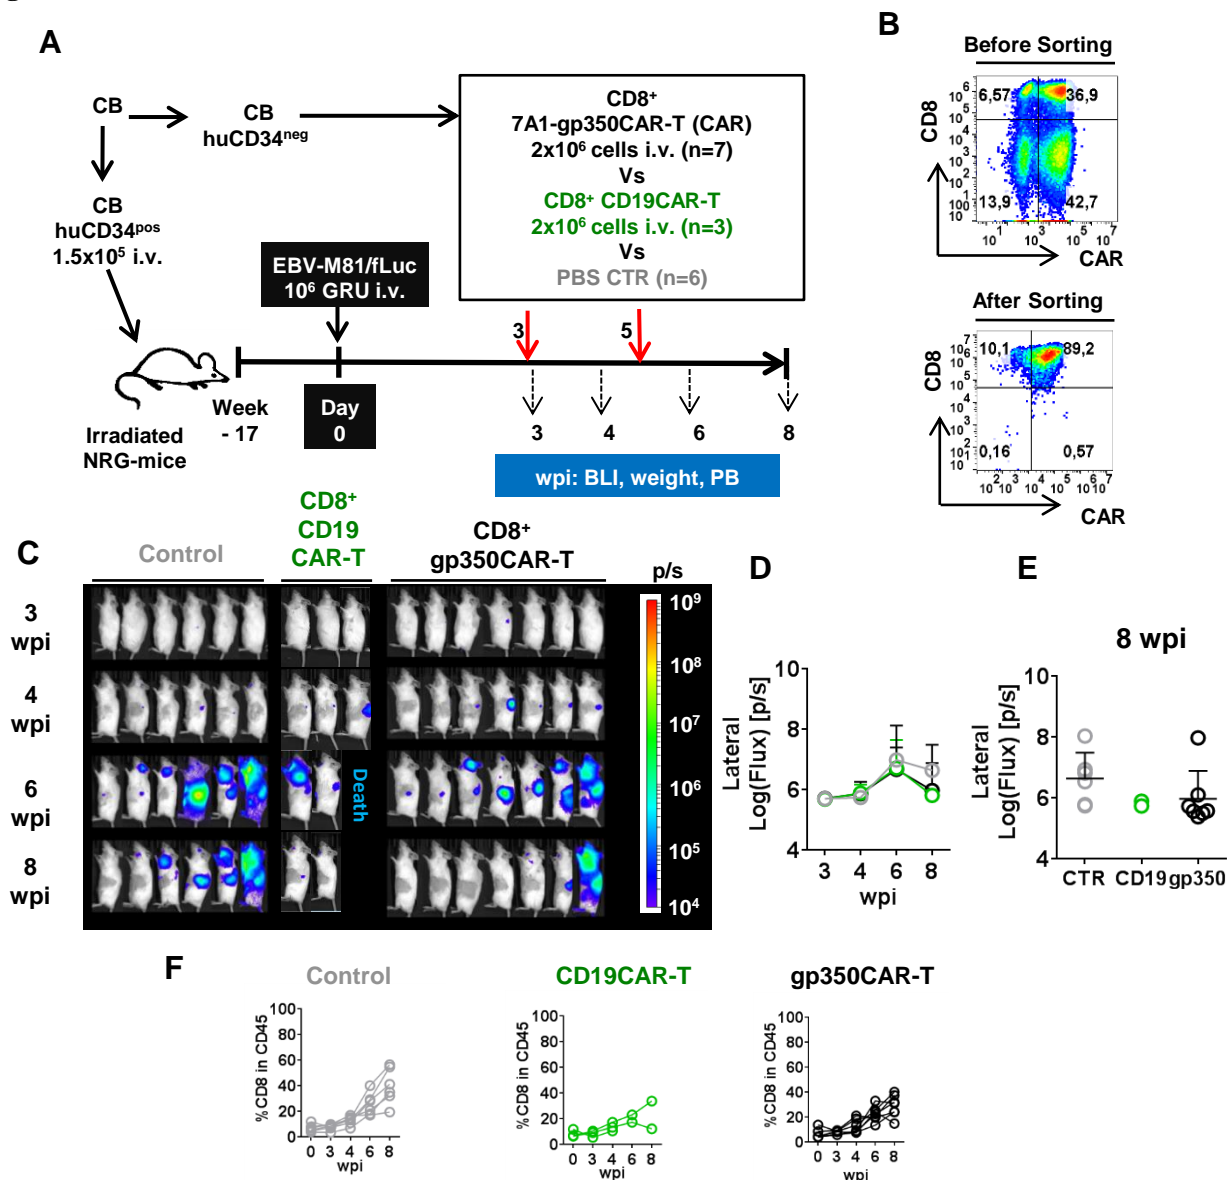**Figure S7 - Comparisons between Control, CD19CAR-T and gp350CAR-T for the therapeutic model (see Fig. 5).**

(A) Schematic representation. (B) Flow cytometry dot-plot graphs showing CD8<sup>+</sup> CD19CAR<sup>+</sup> T cells analyzed before (upper panel) and after (lower panel) sorting for enrichment of CD8<sup>+</sup>/CAR<sup>+</sup> T cells. (C) Sequential BLI analyses showing pictures of the left lateral view of individual mice performed at 3, 4, 6 and 8 wpi. Mice were transplanted with CD34<sup>pos</sup> derived from CB1. The control cohort received PBS i.v. (CTR: n=7, grey) and the test groups received 2x10<sup>6</sup> CD8<sup>+</sup> CAR-T cells i.v. (CD19CAR-T: n=3, green; gp350CAR-T: n=7, black). One mouse of the CD19-CAR-T succumbed at 5 wpi. Signal intensity was measured with the same settings for all mice and depicted in logarithmically scale as Log (Flux) (photons/sec, p/s, see color-coded bar). (D) Serial quantification of the BLI analyses of lateral left body view showing each cohort. (E) Quantification of the BLI analyses of lateral left body view showing each mouse at 8wpi. (F) Sequential analyses of the frequencies of human CD8<sup>+</sup> T cells within huCD45<sup>+</sup> cells in blood for each cohort.



**Figure S8****A**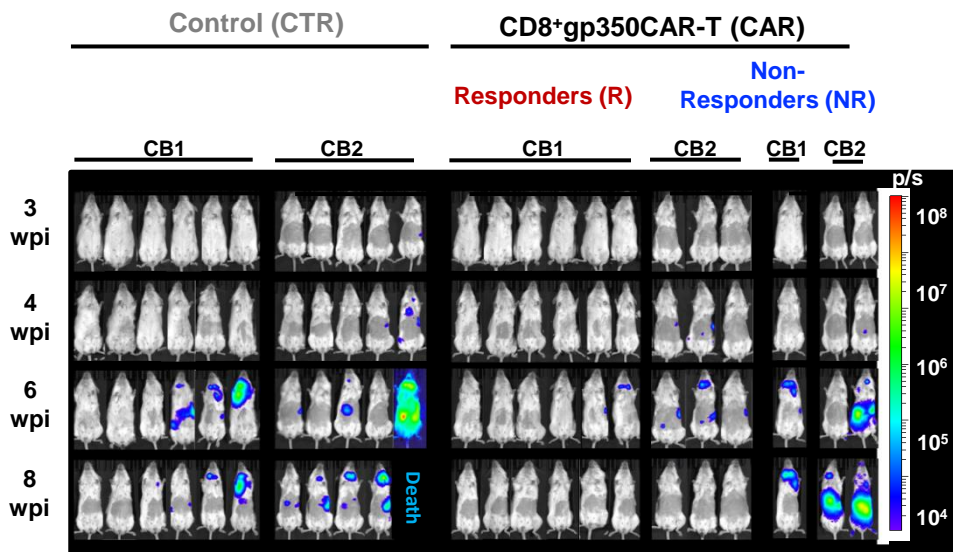**B**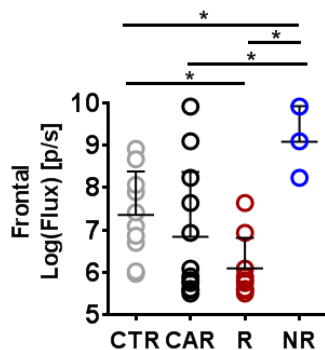**C**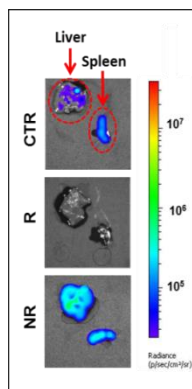**D**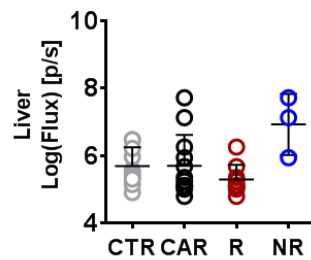**Figure S8 - Additional BLI analyses of therapeutic experiments (see Fig. 5).**

(A) Sequential BLI analyses showing pictures of the frontal view of individual mice performed at 3, 4, 6 and 8 wpi. Mice transplanted with CD34<sup>pos</sup> derived from CB1 and CB2 are indicated. The control cohort received PBS i.v. (CTR: n=11, grey) and the test group received  $2 \times 10^6$  CD8<sup>+</sup>gp350CAR-T cells i.v. (CAR: n=12, black; Responders: n=9, red; non-responders: n=3, blue). One mouse of the control group succumbed at 7 wpi. Signal intensity was measured with the same settings for all mice and depicted in logarithmically scale as Log (Flux) (photons/sec, p/s, see color-coded bar). (B) Quantification of the BLI analyses of frontal body view at endpoint analysis (Log (Flux) p/s). \*  $p < 0.05$ . (C) Representative examples of BLI of explanted organs showing lower signals for organs of responder mice. (D) Quantified BLI analyses of explanted livers.

**Figure S9**

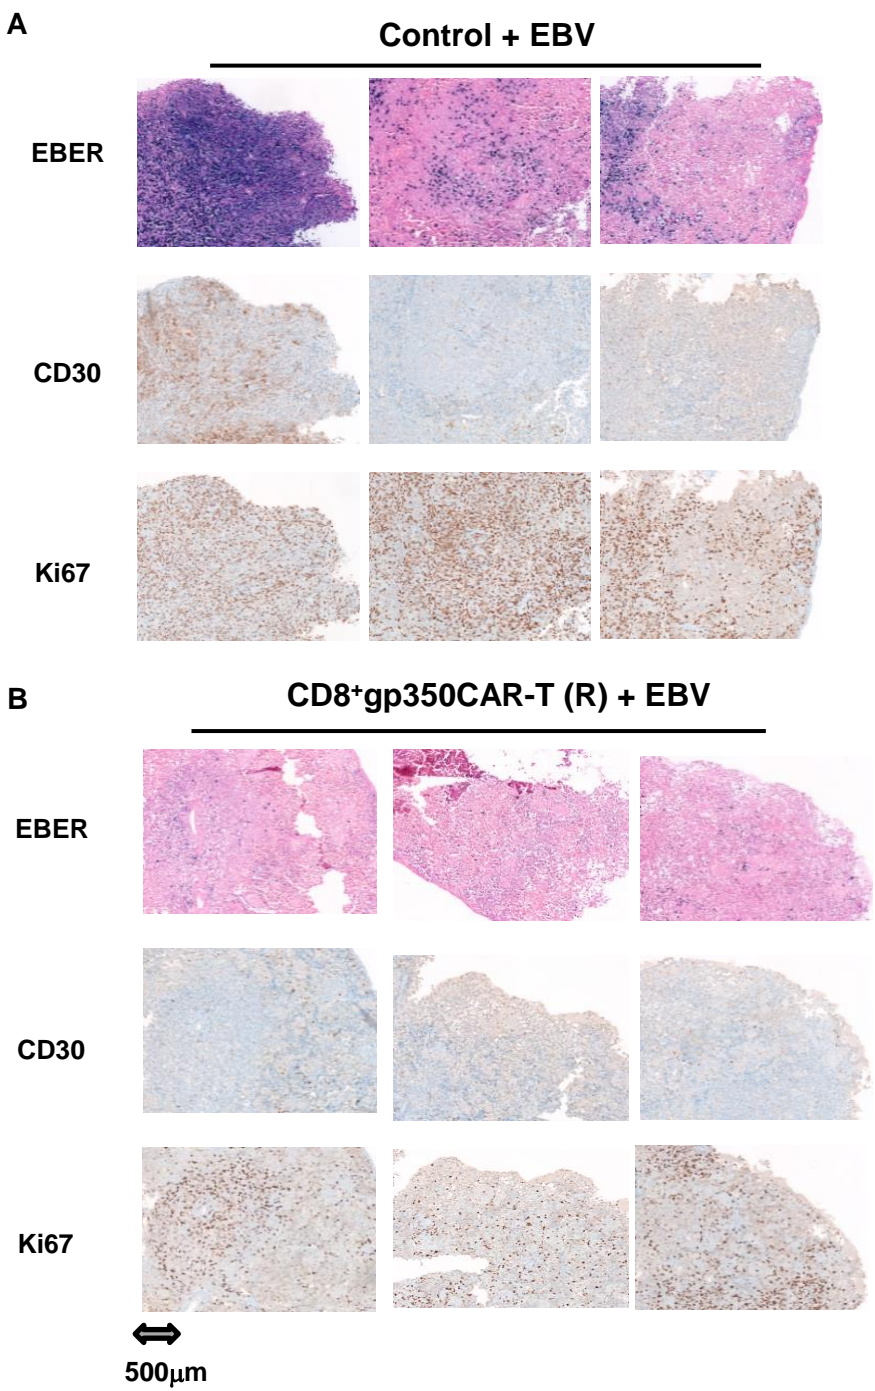

**Figure S9 – Histopathology analyses of spleens .**

(A) Control infected mice (n=3) and (B) Responder mice treated with gp350CAR-T cells (n=3). Upper panels: Detection of EBER by *in situ* hybridization. Middle panels: Immunohistochemistry for detection of CD30<sup>+</sup> cells. Lower panels: Immunohistochemistry for detection of Ki67<sup>+</sup> cells.

**Figure S10**

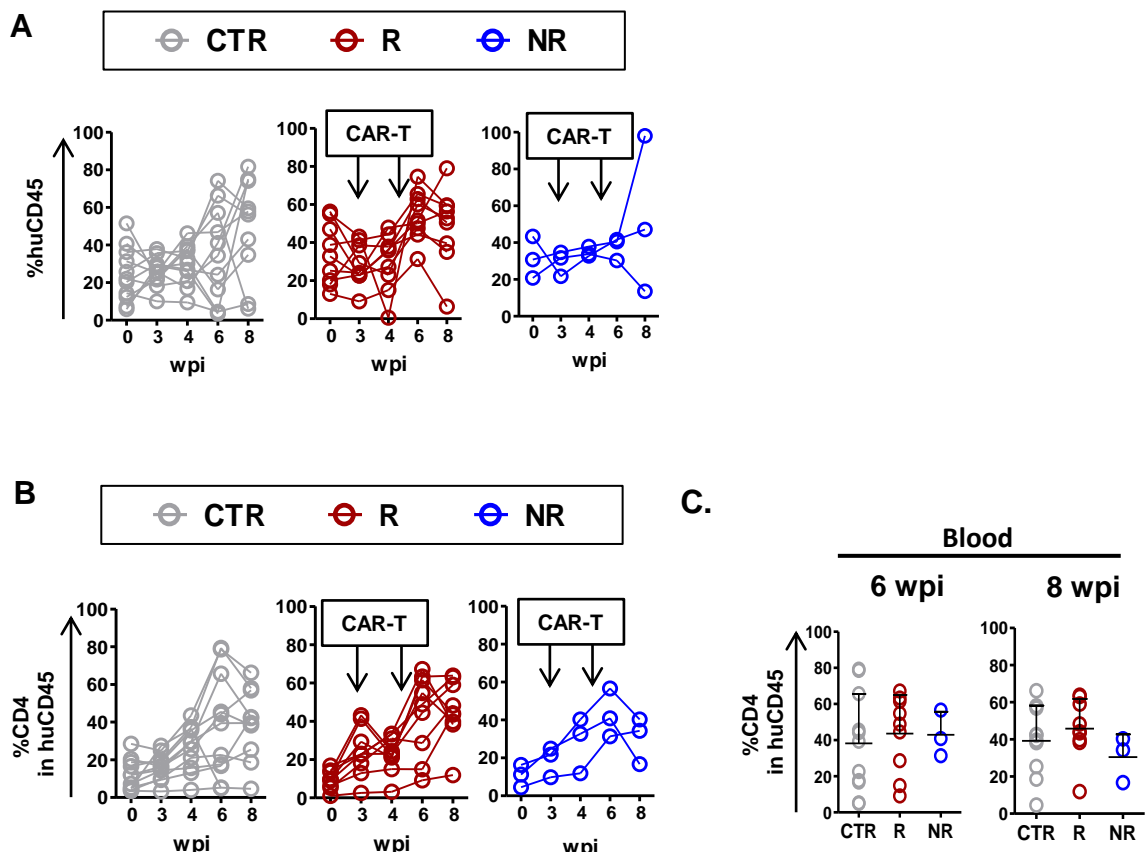

**Figure S10 - Additional immune monitoring data for therapeutic gp350CAR-T cell administration (see Fig. 7).**

(A) Mice were grouped in control (CTR, grey), Responders (R, red) and Non-responders (NR, blue). Analyses performed at baseline prior to (week 0) and after EBV infection (at 3, 4, 6 and 8 wpi). The percentages of human CD45<sup>+</sup> cells within the total blood lymphocytes are shown. Time points of CAR-T cell administrations are indicated. (B) Comparisons between the frequencies of human CD4<sup>+</sup> in CD45<sup>+</sup> cells in blood over the course of the experiment are displayed. Time points of CAR-T cell administrations are indicated. (C) CD4<sup>+</sup> in CD45<sup>+</sup> cells in blood analyzed on weeks 6 (left) and 8 (right) after EBV infection are shown with mean and standard deviation for each group.

**Figure S11**

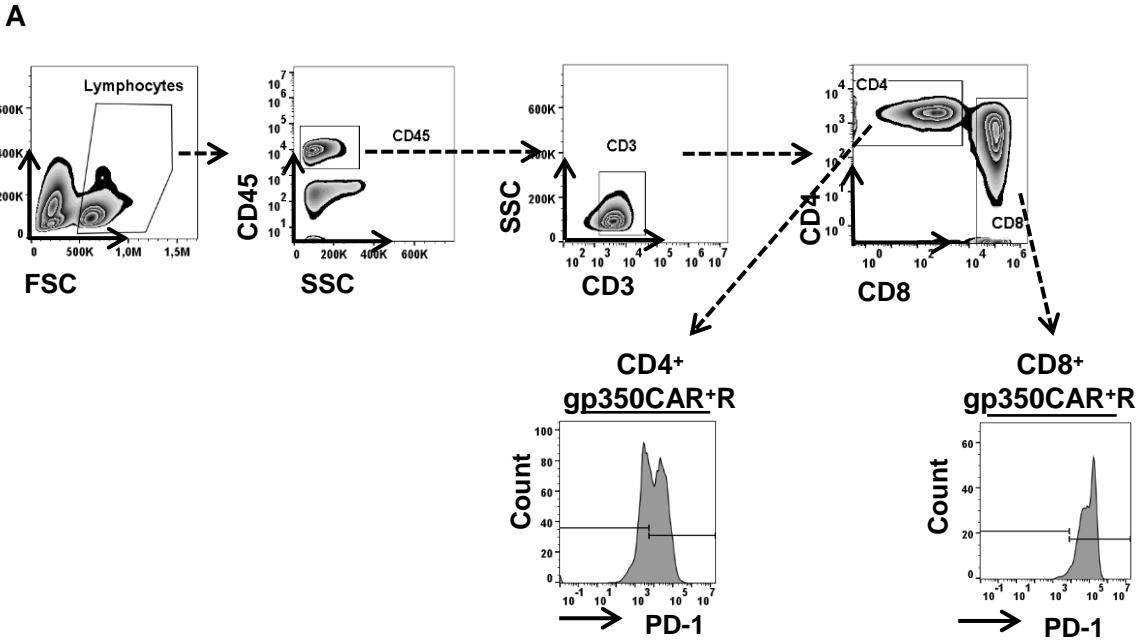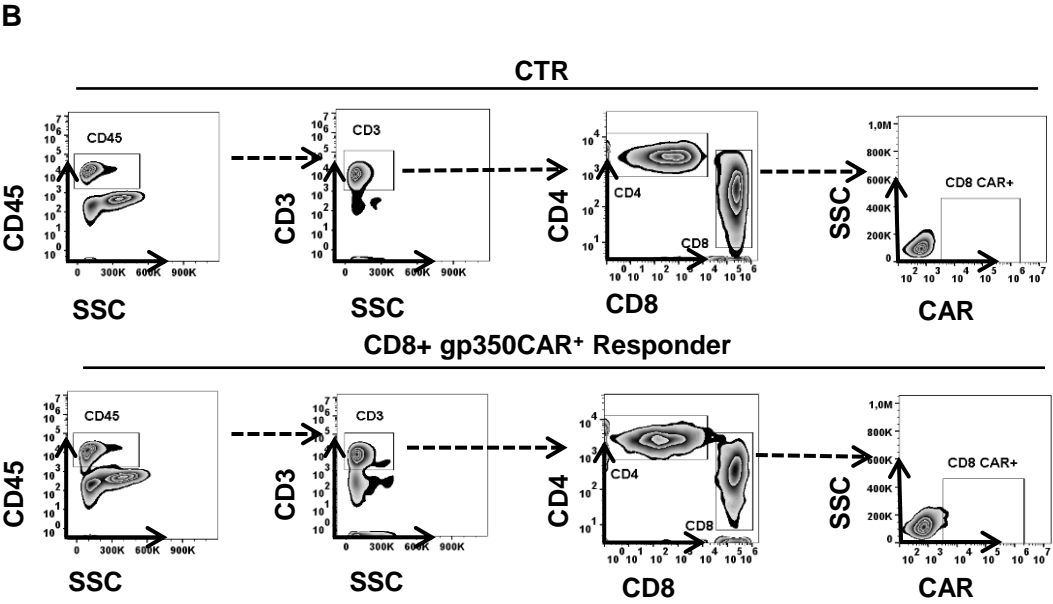

**Figure S11 - Effects on PD-1 expression and CAR detection for therapeutic gp350CAR-T cell administration experiment (see Fig. 7).**

(A) Representative example shows analyses of blood of a mouse treated with CD8<sup>+</sup> gp350CAR-T cells to quantify the MFI of PD-1 expression on CD4<sup>+</sup> and CD8<sup>+</sup> T cells . (B) Flow cytometry gating strategy for quantification of the frequencies of CAR<sup>+</sup> CD8<sup>+</sup> T cells. Representative example for detection of CAR<sup>+</sup> T cells in peripheral blood of a control mouse (upper panels) and mouse treated with CD8<sup>+</sup> gp350CAR-T cells (lower panels).

**Table S1: Descriptive statistics for comparisons between gBCAR-T, 6G4-gp350CAR-T and 7A1-gp350CAR-T cells regarding the CAR expression levels and reactivity against 293T/gp350.**

|                                                     |                                                              | gB    |       | 6G4   |      | 7A1   |       | p       |            |         |
|-----------------------------------------------------|--------------------------------------------------------------|-------|-------|-------|------|-------|-------|---------|------------|---------|
|                                                     |                                                              | Mean  | SD    | Mean  | SD   | Mean  | SD    | gBx6G4  | gBx7A1     | 6G4x7A1 |
| <b>Fig. 1D</b><br>(gB: n=6;<br>6G4 and<br>7A1: n=7) | MFI of CD4 <sup>+</sup> relative to MOCK CD4 <sup>+</sup> -T | 95.68 | 72.59 | 1.91  | 0.36 | 11.11 | 3.50  | 0.00034 | 0.00312    | 0.00001 |
|                                                     | MFI of CD8 <sup>+</sup> relative to MOCK CD8 <sup>+</sup> -T | 53.08 | 36.83 | 1.46  | 0.36 | 6.13  | 2.16  | 0.00035 | 0.00245    | 0.00002 |
| <b>Fig. 1E</b><br>(n=5)                             | CD4 % CAR+                                                   |       |       |       |      | 52.02 | 21.70 |         |            |         |
|                                                     | CD8 % CAR+                                                   |       |       |       |      | 68.00 | 20.25 |         |            |         |
| <b>Fig. 1G</b><br>(n=3)                             | 3:1 (E:T) IFN- $\gamma$ (ng/ml)                              | 0.18  | 0.04  | 15.51 | 0.46 | 21.08 | 0.48  | 0.00070 | 0.00070    | 0.00070 |
|                                                     | 1:1 (E:T) IFN- $\gamma$ (ng/ml)                              | 0.01  | 0.01  | 6.55  | 0.24 | 15.85 | 1.42  | 0.00200 | 0.00800    | 0.00980 |
| <b>Fig. S4 A</b><br>(n=3)                           | 3:1 (E:T) IFN- $\gamma$ (ng/ml)                              | 0.85  | 0.10  | 18.96 | 0.33 | 28.69 | 0.72  | 0.0002  | 0.00055    | 0.0006  |
|                                                     | 1:1 (E:T) IFN- $\gamma$ (ng/ml)                              | 0.03  | 0.04  | 12.00 | 0.91 | 36.59 | 0.02  | 0.0028  | 0.00000001 | 0.0013  |

**Table S2: Descriptive statistics for comparisons between gBCAR-T and 7A1-gp350CAR-T cells regarding reactivity against B95-8.**

|                         |                                           |     | (E:T) | gB     |       | 7A1    |       | p       |
|-------------------------|-------------------------------------------|-----|-------|--------|-------|--------|-------|---------|
|                         |                                           |     |       | Mean   | SD    | Mean   | SD    | gBx7A1  |
| <b>Fig. 2B</b><br>(n=9) | IFN- $\gamma$ (ng/ml)                     | 38h | 0.1:1 | 0.07   | 0.09  | 0.26   | 0.19  | 0.02    |
|                         |                                           |     | 1:1   | 0.12   | 0.09  | 2.31   | 0.86  | <0,0001 |
|                         |                                           |     | 10:1  | 0.82   | 0.90  | 3.96   | 2.36  | 0.01    |
| <b>Fig. 2C</b><br>(n=3) | % proliferating cells in CD4 <sup>+</sup> | 38h | 0.1:1 | 5.63   | 2.81  | 5.78   | 3.44  | 0.96    |
|                         |                                           |     | 1:1   | 3.93   | 2.26  | 6.76   | 4.63  | 0.50    |
|                         |                                           |     | 10:1  | 5.01   | 3.08  | 8.36   | 6.24  | 0.55    |
|                         | % proliferating cells in CD4 <sup>+</sup> | 86h | 0.1:1 | 32.37  | 6.13  | 75.60  | 1.16  | 0.02    |
|                         |                                           |     | 1:1   | 72.30  | 19.82 | 74.23  | 17.00 | 0.92    |
|                         |                                           |     | 10:1  | 18.18  | 18.87 | 64.10  | 5.98  | 0.13    |
| <b>Fig. 2D</b><br>(n=3) | % proliferating cells in CD8 <sup>+</sup> | 38h | 0.1:1 | 4.03   | 0.75  | 4.08   | 1.78  | 0.98    |
|                         |                                           |     | 1:1   | 5.02   | 2.25  | 7.00   | 4.05  | 0.59    |
|                         |                                           |     | 10:1  | 7.09   | 3.82  | 11.05  | 6.24  | 0.50    |
|                         | % proliferating cells in CD8 <sup>+</sup> | 86h | 0.1:1 | 30.80  | 3.80  | 78.87  | 9.72  | 0.03    |
|                         |                                           |     | 1:1   | 65.93  | 16.31 | 84.07  | 5.11  | 0.27    |
|                         |                                           |     | 10:1  | 25.03  | 24.00 | 64.17  | 14.99 | 0.27    |
| <b>Fig. 2E</b><br>(n=3) | % viable targets                          | 38h | 0.1:1 | 95.33  | 5.79  | 95.33  | 4.99  | 1.00    |
|                         |                                           |     | 1:1   | 94.67  | 7.04  | 94.00  | 3.74  | 1.00    |
|                         |                                           |     | 10:1  | 98.67  | 4.11  | 87.33  | 8.73  | 0.60    |
| <b>Fig. 2F</b><br>(n=3) | % viable gp350 <sup>+</sup> targets       | 38h | 0.1:1 | 135.36 | 27.77 | 111.35 | 19.27 | 0.38    |
|                         |                                           |     | 1:1   | 121.56 | 29.32 | 75.62  | 13.75 | 0.28    |
|                         |                                           |     | 10:1  | 102.42 | 14.07 | 24.78  | 7.21  | 0.02    |



**Table S5: Descriptive statistics for comparisons between the cohorts PBS control, CD8<sup>+</sup> CD19CAR-T cells and CD8<sup>+</sup> 7A1-gp350CAR-T cells (all mice, responders or non-responders) regarding therapeutic effects against M81/Luc infection.**

|           |                                       |         | CTR (n=6)  |         | CD19CAR-T (n=3)  |         | gp350CAR-T (n=7) |         | p              |      |                         |            |              |                      |            |                |           |             |              |
|-----------|---------------------------------------|---------|------------|---------|------------------|---------|------------------|---------|----------------|------|-------------------------|------------|--------------|----------------------|------------|----------------|-----------|-------------|--------------|
|           |                                       |         | Mean       | SD      | Mean             | SD      | Mean             | SD      | CTRxCD19 CAR-T |      | CTRxgp350CAR-T          |            |              | CD19CAR-Txgp350CAR-T |            |                |           |             |              |
| Fig. S7D  | Optical imaging lateral log(flux)     | week 3  | 5.71       | 0.05    | 5.69             | 0.06    | 5.72             | 0.03    | 1.00           |      | 1.00                    |            |              | 1.00                 |            |                |           |             |              |
|           |                                       | week 4  | 5.75       | 0.04    | 5.90             | 0.23    | 5.87             | 0.37    | 1.00           |      | 1.00                    |            |              | 1.00                 |            |                |           |             |              |
|           |                                       | week 6  | 6.99       | 1.04    | only 2 mice left |         | 6.68             | 0.68    | 1.00           |      | 1 (uncorrected 0.57)    |            |              | 1.00                 |            |                |           |             |              |
|           |                                       | week 8  | 6.65       | 0.78    | only 2 mice left |         | 5.98             | 0.84    | 0.19           |      | 0.40 (uncorrected 0.20) |            |              | 0.66                 |            |                |           |             |              |
| Fig. S7E  | %CD8 in huCD45                        | week 0  | 6.97       | 2.65    | 8.49             | 2.41    | 6.40             | 3.42    |                |      |                         |            |              |                      |            |                |           |             |              |
|           |                                       | week 3  | 7.80       | 2.14    | 8.48             | 2.07    | 7.65             | 1.45    |                |      |                         |            |              |                      |            |                |           |             |              |
|           |                                       | week 4  | 12.96      | 3.20    | 13.83            | 2.79    | 12.47            | 5.16    |                |      |                         |            |              |                      |            |                |           |             |              |
|           |                                       | week 6  | 25.67      | 8.00    | only 2 mice left |         | 22.81            | 5.52    |                |      |                         |            |              |                      |            |                |           |             |              |
|           |                                       | week 8  | 39.90      | 12.92   | only 2 mice left |         | 29.24            | 8.08    |                |      |                         |            |              |                      |            |                |           |             |              |
|           |                                       |         | CTR (n=11) |         | CAR total (n=12) |         | CAR R (n=8)      |         | CAR NR (n=3)   |      | p                       |            |              |                      |            |                |           |             |              |
|           |                                       |         | Mean       | SD      | Mean             | SD      | Mean             | SD      | Mean           | SD   | CTRxCAR                 | CARx CAR R | CAR x CAR NR | CTRxCAR R R          | CTRxCAR NR | CAR R x CAR NR | w6xw8 CTR | w6xw8 CAR R | w6xw8 CAR NR |
| Fig. 5D-F | Optical imaging lateral log(flux)     | week 3  | 5.88       | 0.25    | 5.88             | 0.25    | 5.83             | 0.23    | 6.01           | 0.25 |                         |            |              |                      |            |                |           |             |              |
|           |                                       | week 4  | 6.23       | 0.77    | 6.19             | 0.64    | 6.19             | 0.72    | 6.19           | 0.24 |                         |            |              |                      |            |                |           |             |              |
|           |                                       | week 6  | 7.03       | 1.31    | 6.92             | 0.96    | 6.87             | 0.69    | 7.09           | 1.49 |                         |            |              |                      |            |                |           |             |              |
|           |                                       | week 8  | 7.14       | 0.96    | 6.41             | 1.24    | 5.72             | 0.23    | 8.47           | 0.55 | 0.15                    | 0.10       | 0.01         | 0.005                | 0.05       | 0.03           | 0.39      | 0.0007      | 0.25         |
| Fig. 5G*  | Viral load in spleen (IU/ug DNA)      | 4947.53 | 5320.47    | 1221.06 | 1604.84          | 1221.06 | 1604.84          | 4013.53 | 2396.57        |      |                         |            | ns           | ns                   | ns         |                |           |             |              |
| Fig. 5 H* | Viral load in bone marrow (IU/ug DNA) | 286.29  | 294.21     | 144.10  | 203.17           | 144.10  | 203.17           | 5884.33 | 7838.05        |      |                         |            | ns           | ns                   | ns         |                |           |             |              |
| Fig. S8B* | Optical imaging frontal log(flux)     | week 8  | 7.36       | 0.97    | 6.84             | 1.47    | 6.09             | 0.68    | 9.08           | 0.69 | 0.35                    | 0.16       | 0.01         | 0.02                 | 0.04       | 0.02           |           |             |              |
| Fig. S8D  | Optical imaging Liver log(flux)       |         | 5.69       | 0.53    | 5.70             | 0.88    | 5.29             | 0.41    | 6.92           | 0.74 | 0.973                   | 0.192      | 0.123        | 0.1                  | 0.129      | 0.079          |           |             |              |

**Table S6: Descriptive statistics for comparisons between the cohorts PBS control and CD8<sup>+</sup> 7A-gp350CAR-T cells (all mice, responders or non-responders) regarding weight and therapeutic effects against LPD.**

|          |                                               |                                        | CTR (n=11) |       | CAR total (n=12) |       | CAR R (n=8) |        | CAR NR (n=3) |        | p         |            |              |             |            |                |
|----------|-----------------------------------------------|----------------------------------------|------------|-------|------------------|-------|-------------|--------|--------------|--------|-----------|------------|--------------|-------------|------------|----------------|
|          |                                               |                                        | Mean       | SD    | Mean             | SD    | Mean        | SD     | Mean         | SD     | CTRxCAR R | CARx CAR R | CAR x CAR NR | CTRxCAR R R | CTRxCAR NR | CAR R x CAR NR |
| Fig.6A   | Relative weight change                        | week 1                                 | 102.56%    | 3.40% | 103.02%          | 2.91% | 102.47%     | 2.40%  | 104.68%      | 3.62%  | 0.74      | 0.66       | 0.59         | 1.00        | 1.00       | 1.00           |
|          |                                               | week 2                                 | 104.18%    | 2.37% | 104.94%          | 1.94% | 104.95%     | 2.17%  | 104.92%      | 0.96%  | 0.44      | 0.99       | 0.98         | 1.00        | 1.00       | 1.00           |
|          |                                               | week 3                                 | 105.68%    | 2.60% | 105.47%          | 1.73% | 105.63%     | 1.96%  | 105.00%      | 0.34%  | 0.84      | 0.86       | 0.42         | 1.00        | 1.00       | 1.00           |
|          |                                               | week 4                                 | 105.99%    | 4.26% | 105.17%          | 3.87% | 105.36%     | 3.58%  | 104.59%      | 4.59%  | 0.65      | 0.91       | 0.88         | 1.00        | 1.00       | 1.00           |
|          |                                               | week 5                                 | 102.87%    | 3.57% | 104.00%          | 3.59% | 104.29%     | 3.47%  | 103.14%      | 3.80%  | 0.48      | 0.86       | 0.79         | 1.00        | 1.00       | 1.00           |
|          |                                               | week 6                                 | 100.79%    | 3.18% | 103.41%          | 3.69% | 103.92%     | 3.79%  | 101.88%      | 2.85%  | 0.10      | 0.77       | 0.55         | 0.24        | 0.89       | 0.89           |
|          |                                               | week 7                                 | 104.01%    | 6.76% | 106.42%          | 4.38% | 107.50%     | 4.39%  | 103.20%      | 2.22%  | 0.35      | 0.61       | 0.17         | 0.41        | 0.77       | 0.29           |
|          |                                               | week 8                                 | 100.99%    | 9.17% | 102.95%          | 7.64% | 105.43%     | 4.42%  | 95.50%       | 10.03% | 0.60      | 0.38       | 0.41         | 0.59        | 0.59       | 0.59           |
| Fig. 6C* | #EBER <sup>+</sup> /mm <sup>2</sup> in spleen | 2035.73                                | 3594.60    | 98.27 | 90.95            | 55.38 | 58.32       | 212.67 | 57.16        | 0.11   | 0.47      | 0.02       | 0.08         | 0.98        | 0.02       |                |
| Fig. 6D  | %EBER <sup>+</sup> in spleen                  | 11.72                                  | 19.40      | 0.63  | 0.61             | 0.32  | 0.37        | 1.47   | 0.23         | 0.10   | 0.21      | 0.01       | 0.19         | 0.19        | 0.01       |                |
| Fig. 6G  | Spleen                                        | % CD3 <sup>+</sup> /Ki67 <sup>+</sup>  | 29.32      | 8.14  |                  |       | 24.30       | 10.73  |              |        |           |            |              | 0.3242      |            |                |
|          |                                               | % CD20 <sup>+</sup> /Ki67 <sup>+</sup> | 7.27       | 14.31 |                  |       | 3.93        | 1.10   |              |        |           |            |              | 0.2827      |            |                |

**Table S7: Descriptive statistics for comparisons between the cohorts PBS control and CD8<sup>+</sup> 7A-gp350CAR-T cells (all mice, responders or non-responders) regarding the immunologic effects in the therapeutic model.**

|          |                                            |          | CTR (n=11) |          | CAR R (n=8) |          | CAR NR (n=3) |         | p         |            |                                                | statistical test applied                       |
|----------|--------------------------------------------|----------|------------|----------|-------------|----------|--------------|---------|-----------|------------|------------------------------------------------|------------------------------------------------|
|          |                                            |          | Mean       | SD       | Mean        | SD       | Mean         | SD      | CTRxCAR R | CTRxCAR NR | CAR Rx CAR NR                                  |                                                |
| Fig.7A+B | %CD8 <sup>+</sup> in huCD45 in blood       | week 0   | 5.62       | 2.54     | 5.08        | 2.77     | 7.61         | 4.56    | 0.94      |            |                                                | ANCOVA                                         |
|          |                                            | week 3   | 7.28       | 2.42     | 7.47        | 2.06     | 9.36         | 4.13    |           |            |                                                |                                                |
|          |                                            | week 4   | 11.61      | 4.92     | 15.37       | 9.03     | 14.27        | 5.57    |           |            |                                                |                                                |
|          |                                            | week 6   | 27.22      | 12.28    | 32.62       | 15.43    | 34.33        | 6.20    |           |            |                                                |                                                |
|          |                                            | week 8   | 49.71      | 16.56    | 34.00       | 11.25    | 57.90        | 14.93   |           |            |                                                |                                                |
|          |                                            | week 6   | 27.22      | 12.28    | 32.62       | 15.43    | 34.33        | 6.20    | 0.86      | 0.82       | 0.86                                           |                                                |
|          |                                            | week 8   | 49.71      | 16.56    | 34.00       | 11.25    | 57.90        | 14.93   | 0.10      | 0.54       | 0.28                                           | Welch's t test with Bonferroni-Holm correction |
| Fig.7C   | # CD8 <sup>+</sup> in spleen               | 8.55E+06 | 5.76E+06   | 7.56E+06 | 5.42E+06    | 6.15E+06 | 1.30E+06     | 1.00    | 1.00      | 1.00       | Welch's t test with Bonferroni-Holm correction |                                                |
|          | # CD4 <sup>+</sup> in spleen               | 5.12E+06 | 3.17E+06   | 1.02E+07 | 1.05E+07    | 3.31E+06 | 1.28E+06     | 0.65    | 0.75      | 0.53       |                                                |                                                |
| Fig.7D*  | MFI PD-1 R1                                | in CD8   | 73993.17   | 30234.36 | 59176.50    | 10452.24 | n=1          |         | 0.50      |            |                                                | Welch's t test with Bonferroni-Holm correction |
|          |                                            | in CD4   | 50503.17   | 15402.12 | 53875.50    | 13231.48 |              |         | 0.66      |            |                                                |                                                |
|          | MFI PD-1 R2                                | in CD8   | 292.25     | 25.79    | 241.67      | 3.30     | n=2          |         | 0.03      |            |                                                |                                                |
|          |                                            | in CD4   | 556.25     | 79.32    | 442.67      | 41.77    |              |         | 0.08      |            |                                                |                                                |
| Fig. 7E  | % CAR <sup>+</sup> in huCD45/CD8 at week 8 | 0.16     | 0.29       | 0.65     | 0.63        | 0.48     | 0.67         | 0.44    | 1.00      | 1.00       | Wilcoxon test with correction for ties         |                                                |
| Fig. 7F  | Cytokines (pg/ml)                          | IFN-γ *  | 147.24     | 120.48   | 69.77       | 54.72    | 1745.88      | 1214.62 | 0.19      | 0.19       | 0.19                                           | Welch's t test with Bonferroni-Holm correction |
|          |                                            | IL-10*   | 39.25      | 37.27    | 16.57       | 9.56     | 631.27       | 521.94  | 0.25      | 0.25       | 0.12                                           | Wilcoxon test with correction for ties         |
|          |                                            | IL-12    | 2.37       | 2.01     | 2.91        | 2.86     | 10.62        | 5.96    | 0.79      | 0.29       | 0.29                                           |                                                |
|          |                                            | IL-6     | 4.59       | 8.29     | 0.01        | 0.00     | 30.48        | 24.69   | 0.41      | 0.41       | 0.16                                           |                                                |
|          |                                            | IL-8*    | 16.02      | 29.65    | 7.07        | 13.01    | 34.42        | 35.47   | 0.80      | 0.65       | 0.65                                           | Welch's t test with Bonferroni-Holm correction |
| MCP-1*   | 38.71                                      | 31.14    | 25.78      | 14.40    | 71.24       | 61.45    | 1.00         | 1.00    | 1.00      |            |                                                |                                                |

For Figures marked with a \* in the tables, p-values were calculated with log values without log display in the figures or the tables.



**Table S8: List of used antibodies**

| <b>EBNA2 staining</b>                            |                              |                |                                                                 |                     |
|--------------------------------------------------|------------------------------|----------------|-----------------------------------------------------------------|---------------------|
| <b>Antibody</b>                                  | <b>Flouochrome conjugate</b> | <b>Clone</b>   | <b>Company</b>                                                  | <b>Order number</b> |
| Rat anti-EBNA2                                   | -                            | R3             | Merck                                                           | Q69022              |
| Mouse anti-rat IgG<br>AF 647                     | AF 647                       | Polyclonal     | Jackson<br>ImmunoResearch<br>Laboratories                       | 212-605-082         |
| <b>Blocking</b>                                  |                              |                |                                                                 |                     |
|                                                  |                              |                | <b>Company</b>                                                  | <b>Order number</b> |
| PBS with 10% human serum                         |                              |                | Capricorn Scientific,<br>Ebsdorfergrund,<br>Germany             | HUM-3B              |
| PBS with 10 µg/ml mouse-IgG                      |                              |                | Sigma-Aldrich, St. Louis,<br>MO                                 | MFCD00212351        |
| <b>gp350 Staining</b>                            |                              |                |                                                                 |                     |
| <b>Antibody</b>                                  | <b>Flouochrome conjugate</b> | <b>Clone</b>   | <b>Company</b>                                                  | <b>Order number</b> |
| gp350 primary<br>antibodies                      | -                            | 6G4, 7A1, 72A1 | kindly provided by<br>GeneVector Laboratory,<br>Munich, Germany | -                   |
| Mouse anti-rat IgG<br>AF 647                     | AF 647                       | Polyclonal     | Jackson<br>ImmunoResearch<br>Laboratories                       | 212-605-082         |
| Goat anti-mouse IgG                              | AF 647                       | Polyclonal     | Jackson<br>ImmunoResearch<br>Laboratories                       | 115-605-003         |
| <b>Detection of hematopoetic cells</b>           |                              |                |                                                                 |                     |
| <b>Antibody</b>                                  | <b>Flouochrome conjugate</b> | <b>Clone</b>   | <b>Company</b>                                                  | <b>Order number</b> |
| Anti-human CD45                                  | Pacific Blue                 | HI30           | Biolegend                                                       | 304022              |
| Anti-human CD19                                  | AF700                        | HIB19          | Biolegend                                                       | 302225              |
| Anti-human CD3                                   | BV510                        | UGHT1          | Biolegend                                                       | 300448              |
| Anti-human CD4                                   | PerCP                        | Okt 04         | Biolegend                                                       | 317432              |
| Anti-human CD8                                   | PECy7                        | HIT8a          | Biolegend                                                       | 300914              |
| Anti-human CD62-L                                | PECy5                        | DREG56         | Biolegend                                                       | 304808              |
| Anti-human CD45RA                                | FITC                         | HI100          | Biolegend                                                       | 304106              |
| Anti-human PD-1                                  | PE                           | EH12.2H7       | Biolegend                                                       | 329906              |
| <b>CAR detection</b>                             |                              |                |                                                                 |                     |
| <b>Antibody</b>                                  | <b>Flouochrome conjugate</b> | <b>Clone</b>   | <b>Company</b>                                                  | <b>Order number</b> |
| Goat Anti-Human<br>IgG, Fcγ fragment<br>specific | AF 488                       | Polyclonal     | Jackson<br>ImmunoResearch<br>Laboratories                       | 109-545-008         |
| Goat Anti-Human<br>IgG, Fcγ fragment<br>specific | AF 647                       | Polyclonal     | Jackson<br>ImmunoResearch<br>Laboratories                       | 109-605-008         |
| <b>Immunohistochemistry</b>                      |                              |                |                                                                 |                     |
| <b>Antibody</b>                                  | <b>Flouochrome conjugate</b> | <b>Clone</b>   | <b>Company</b>                                                  | <b>Order number</b> |
| Anti-human CD3                                   | Opal 650                     | polyclonal     | DAKO                                                            | A0452               |
| Anti-human CD20                                  | Opal 690                     | L26            | DAKO                                                            | M0755               |
| Anti-human Ki67                                  | Opal 620                     | SP6            | Thermofisher Scientific                                         | RM9106-S1           |
